# Supplementary material for: ABCC5, ERCC2, XPA and XRCC1 transcript abundance levels correlate with cisplatin chemoresistance in non-small cell lung cancer cell lines.
Source: Springer Nature journal article supplement (doi:10.1186/1476-4598-4-18), 2005-01-01
Supplement: 12943_2004_107_MOESM1_ESM.pdf [file 12943_2004_107_MOESM1_ESM.pdf]

Supplemental Table 1

| NSCLC cell line | Group number <sup>a</sup> | cisIC50 <sup>b</sup> | LIG1 <sup>c</sup> | ERCC2    | ERCC3    | DDIT3    | ABCC1    | ABCC4    | ABCC5    | ABCC10   | GTF2H2   | XPA      | XPC      | XRCC1    |
|-----------------|---------------------------|----------------------|-------------------|----------|----------|----------|----------|----------|----------|----------|----------|----------|----------|----------|
| H460            | 1                         | 0.52                 | 3.53E+02          | 2.54E+02 | 3.07E+02 | 1.00E+02 | 7.37E+02 | 3.50E+02 | 5.90E+01 | 1.80E+01 | 1.02E+03 | 3.10E+02 | 5.25E+02 | 1.88E+03 |
| H1155           | 1                         | 0.9                  | 5.90E+02          | 5.81E+02 | 1.27E+03 | 1.26E+03 | 3.84E+02 | 3.30E+02 | 9.00E+01 | 4.30E+01 | 1.09E+03 | 1.65E+03 | 2.33E+03 | 4.04E+03 |
| H23             | 1                         | 2.09                 | 7.74E+02          | 8.29E+02 | 1.81E+03 | 1.55E+03 | 3.13E+02 | 1.87E+03 | 1.39E+02 | 4.56E+02 | 4.42E+03 | 1.18E+03 | 1.44E+03 | 8.27E+03 |
| H838            | 1                         | 3.86                 | 1.16E+03          | 8.69E+03 | 1.81E+03 | 5.79E+02 | 6.21E+03 | 1.35E+03 | 4.01E+02 | 5.12E+02 | 4.18E+03 | 2.23E+03 | 5.36E+03 | 3.14E+04 |
| H1334           | 1                         | 5.15                 | 4.50E+02          | 1.28E+03 | 7.66E+02 | 6.17E+02 | 5.48E+02 | 6.05E+02 | 9.90E+01 | 1.17E+02 | 1.33E+03 | 5.07E+02 | 1.18E+03 | 6.53E+03 |
| H1437           | 1                         | 5.9                  | 2.56E+02          | 6.13E+02 | 3.72E+02 | 4.59E+02 | 8.48E+02 | 4.10E+01 | 2.64E+02 | 2.00E+02 | 1.74E+03 | 5.84E+02 | 7.30E+02 | 2.84E+03 |
| H1355           | 1                         | 6.74                 | 9.03E+02          | 6.52E+02 | 1.01E+03 | 3.75E+02 | 1.48E+03 | 1.10E+03 | 2.67E+02 | 8.30E+01 | 1.04E+03 | 1.34E+03 | 1.37E+03 | 4.57E+03 |
| H1435           | 1                         | 22.86                | 2.59E+03          | 3.01E+04 | 3.37E+03 | 3.76E+03 | 9.24E+03 | 2.24E+03 | 1.39E+03 | 3.31E+02 | 2.84E+03 | 6.77E+03 | 1.93E+03 | 4.19E+04 |
| H358            | 2                         | 1.16                 |                   | 1.32E+03 |          |          |          |          | 6.80E+01 |          | 1.02E+03 | 1.34E+03 | 1.03E+03 | 4.02E+03 |
| H322            | 2                         | 2.85                 |                   | 4.02E+03 |          |          |          |          | 4.50E+01 |          | 6.63E+02 | 6.64E+02 | 5.51E+02 | 3.87E+03 |
| H441            | 2                         | 3.38                 |                   | 1.19E+03 |          |          |          |          | 1.57E+02 |          | 1.14E+03 | 6.11E+02 | 7.28E+02 | 2.96E+03 |
| H522            | 2                         | 3.53                 |                   | 7.12E+02 |          |          |          |          | 4.03E+02 |          | 2.46E+03 | 4.83E+02 | 4.54E+02 | 2.41E+03 |
| H226            | 2                         | 5.05                 |                   | 8.85E+02 |          |          |          |          | 1.04E+02 |          | 1.10E+03 | 5.97E+02 | 3.52E+03 | 2.46E+03 |
| H647            | 2                         | 7.27                 |                   | 4.64E+03 |          |          |          |          | 1.92E+02 |          | 8.84E+02 | 1.06E+03 | 2.71E+03 | 1.04E+04 |

<sup>a</sup> Group 1 is the initial set of 8 NSCLC cell lines evaluated. Group 2 is the additional set of 6 NSCLC cell lines evaluated.

<sup>b</sup> Previously published results by Chun-Ming Tsai, et.al. [20]

<sup>c</sup> All mean values resulting from triplicate experimental determinations are reported as the number of molecules of the gene listed per 10<sup>6</sup> molecules of ACTB.
